# Supplementary material
Source: PubMed Central journal article supplement (PMC2867064)
Supplement: NIHMS142987-supplement-SuppData01.pdf [file NIHMS142987-supplement-SuppData01.pdf]

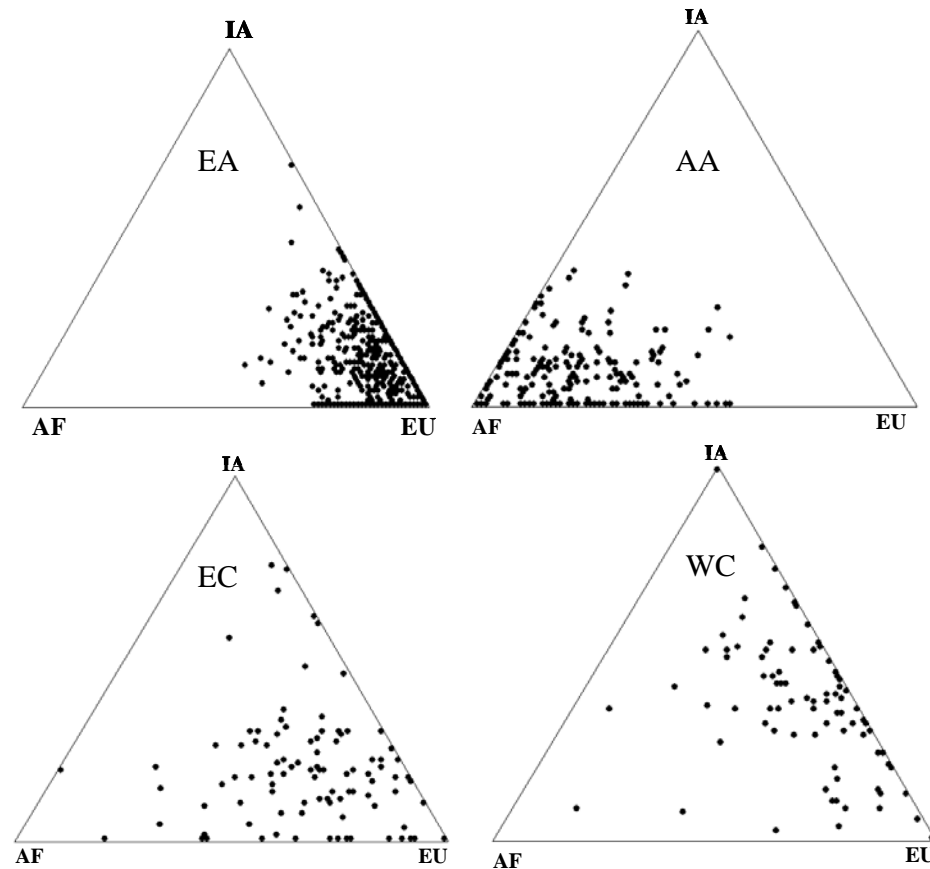

**Supp. Figure S1. Distribution of Individual ML admixture estimates.** Triangle plots showing the distribution of individual admixture estimates obtained with ML. Each vertex of a plot represents one ancestral population and all individuals plotting at the vertex are unadmixed. Points closer to the vertex represent individuals with greater admixture from that population. Points along any axis represent individuals who have no admixture from the ancestral population at the opposite vertex. Where multiple individuals have the same admixture proportions, they have been overlaid. These plots illustrate the overall distribution of admixture in the sample and should be examined in association with the histograms shown in Figure 1. EA: European; AF: West African; IA: Indigenous American ancestral populations. EA: European Americans; AA: African Americans; EC: East Coast Hispanics (from Connecticut); WC: West Coast Hispanics (from CA).

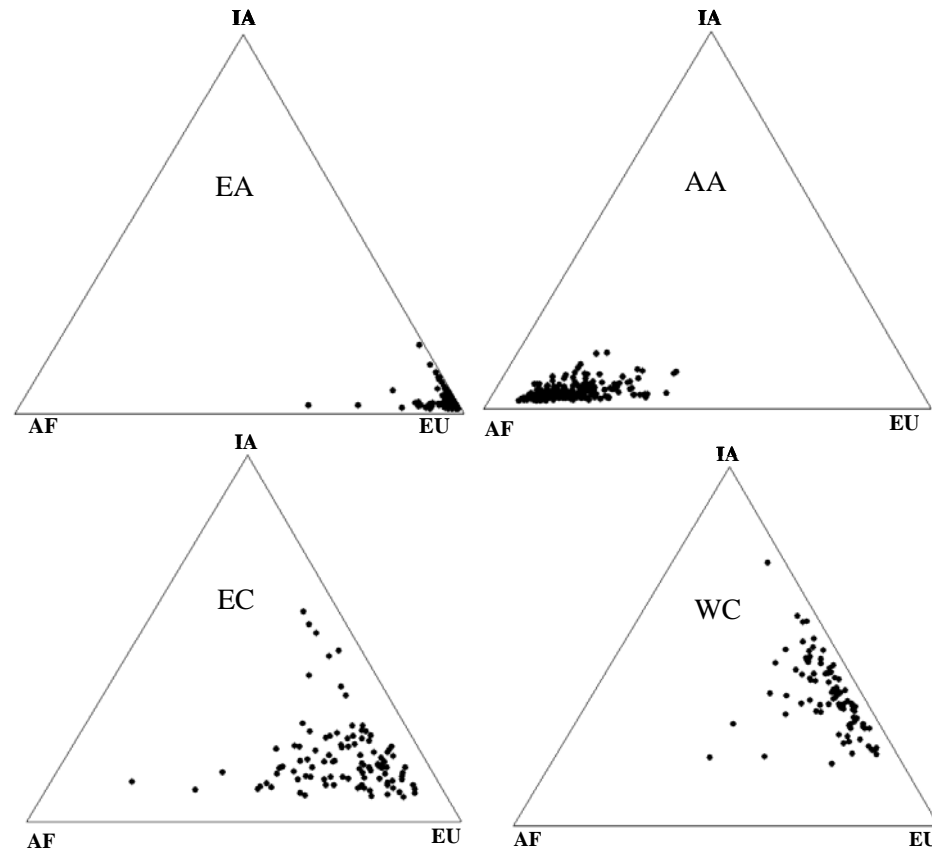

**Supp. Figure S2. Distribution of individual admixture estimates obtained with STRUCTURE.** Triangle plots showing the distribution of individual admixture estimates obtained with STRUCTURE. Each vertex of a plot represents one ancestral population and all individuals plotting at the vertex are unadmixed. Points closer to the vertex represent individuals with greater admixture from that population. Points along any axis represent individuals who have no admixture from the ancestral population at the opposite vertex. Where multiple individuals have the same admixture proportions, they have been overlaid. These plots illustrate the overall distribution of admixture in the sample and should be examined in association with the histograms shown in Figure 2. Compared to the plots shown in Supp. Figure S1, the distributions are more tightly clustered. EA: European Americans; AF: West African; IA: Indigenous American ancestral populations. EA: European Americans; AA: African Americans; EC: East Coast Hispanics (from Connecticut); WC: West Coast Hispanics (from CA).

**Supp. Table S1. Allele frequencies in different ancestral populations and tested populations.**

Allele frequencies for EU, AF, IA, EA, AA, EC and WC samples are shown. First row shows the numbers of individuals genotyped for the allele. First column shows the alleles as no. of microsatellite repeats. EU: Spanish, AF: Mende, IA: Nahua, EA: European Americans from CT, AA: African Americans from CT, EC: Hispanics from CT, WC: Hispanics from CA. “na” Marker was not typed in this sample and no genotypes were available.

\* Marker not in HWE: Homozygote deficiency.

\*\* Marker not in HWE: Heterozygote deficiency.

|               | EU    | AF    | IA    | EA    | AA    | EC    | WC    |
|---------------|-------|-------|-------|-------|-------|-------|-------|
| <b>CSF1PO</b> | 55    | 75    | 88    | 629   | 221   | 100   | 89    |
| 309           | 0     | 0.067 | 0     | 0.001 | 0.043 | 0.02  | 0.006 |
| 313           | 0     | 0.093 | 0     | 0.004 | 0.068 | 0.02  | 0     |
| 317           | 0     | 0.047 | 0.051 | 0.019 | 0.034 | 0.03  | 0.022 |
| 321           | 0.273 | 0.227 | 0.199 | 0.288 | 0.267 | 0.21  | 0.225 |
| 325           | 0.327 | 0.193 | 0.261 | 0.294 | 0.244 | 0.295 | 0.298 |
| 329           | 0.345 | 0.293 | 0.415 | 0.318 | 0.287 | 0.375 | 0.399 |
| 333           | 0.055 | 0.08  | 0.057 | 0.064 | 0.052 | 0.04  | 0.051 |
| 337           | 0     | 0     | 0.017 | 0.012 | 0.005 | 0.01  | 0     |
| 341           | 0     | 0     | 0     | 0     | 0     | 0     | 0     |
| <b>D2S133</b> | 56    | 77    | 88    | 630   | 220** | 102** | 87    |
| 304           | 0     | 0     | 0     | 0     | 0.005 | 0     | 0     |
| 308           | 0     | 0.006 | 0     | 0.002 | 0     | 0     | 0     |
| 312           | 0.036 | 0.045 | 0     | 0.043 | 0.059 | 0.044 | 0.011 |
| 316           | 0.295 | 0.065 | 0.108 | 0.22  | 0.111 | 0.235 | 0.218 |
| 320           | 0.089 | 0.045 | 0.023 | 0.081 | 0.034 | 0.074 | 0.069 |
| 324           | 0.116 | 0.214 | 0.273 | 0.121 | 0.173 | 0.162 | 0.247 |
| 328           | 0.179 | 0.052 | 0.182 | 0.139 | 0.064 | 0.137 | 0.115 |
| 332           | 0.045 | 0.136 | 0.011 | 0.034 | 0.152 | 0.034 | 0.04  |
| 336           | 0.018 | 0.162 | 0.085 | 0.025 | 0.116 | 0.049 | 0.023 |
| 340           | 0.054 | 0.13  | 0.25  | 0.106 | 0.109 | 0.093 | 0.121 |
| 344           | 0.071 | 0.052 | 0.045 | 0.113 | 0.093 | 0.108 | 0.075 |
| 348           | 0.071 | 0.058 | 0.023 | 0.099 | 0.064 | 0.054 | 0.069 |
| 352           | 0.027 | 0.013 | 0     | 0.015 | 0.016 | 0.01  | 0.011 |
| 356           | 0     | 0.006 | 0     | 0.002 | 0.005 | 0     | 0     |
| 360           | 0     | 0.013 | 0     | 0     | 0     | 0     | 0     |
| <b>D3S135</b> | 59    | 77    | 87    | 650   | 228   | 101   | 89    |
| 108           | 0     | 0     | 0     | 0.002 | 0     | 0     | 0.006 |
| 112           | 0     | 0.026 | 0     | 0     | 0     | 0.005 | 0     |
| 116           | 0     | 0.006 | 0.011 | 0.006 | 0.009 | 0.005 | 0     |
| 120           | 0.068 | 0.104 | 0.069 | 0.131 | 0.112 | 0.104 | 0.079 |

|               |       |       |       |       |       |       |       |
|---------------|-------|-------|-------|-------|-------|-------|-------|
| 124           | 0.271 | 0.292 | 0.586 | 0.232 | 0.303 | 0.312 | 0.343 |
| 128           | 0.271 | 0.331 | 0.247 | 0.272 | 0.344 | 0.252 | 0.315 |
| 132           | 0.195 | 0.195 | 0.08  | 0.202 | 0.178 | 0.188 | 0.135 |
| 136           | 0.178 | 0.039 | 0.006 | 0.141 | 0.053 | 0.129 | 0.124 |
| 140           | 0.017 | 0.006 | 0     | 0.012 | 0.002 | 0     | 0     |
| 144           | 0     | 0     | 0     | 0.002 | 0     | 0.005 | 0     |
| <hr/>         |       |       |       |       |       |       |       |
| <b>D5S818</b> | 58    | 72    | 87    | 649   | 228   | 102** | 89    |
| <hr/>         |       |       |       |       |       |       |       |
| 135           | 0     | 0.007 | 0.08  | 0.001 | 0.002 | 0.054 | 0.039 |
| 139           | 0     | 0.035 | 0     | 0.004 | 0.059 | 0.025 | 0.011 |
| 143           | 0.034 | 0.014 | 0.109 | 0.045 | 0.015 | 0.049 | 0.079 |
| 147           | 0.069 | 0.049 | 0.017 | 0.058 | 0.039 | 0.039 | 0.056 |
| 151           | 0.388 | 0.222 | 0.563 | 0.343 | 0.219 | 0.363 | 0.433 |
| 155           | 0.259 | 0.326 | 0.184 | 0.359 | 0.39  | 0.333 | 0.287 |
| 159           | 0.241 | 0.313 | 0.046 | 0.179 | 0.257 | 0.127 | 0.096 |
| 163           | 0.009 | 0.028 | 0     | 0.01  | 0.011 | 0.01  | 0     |
| 167           | 0     | 0     | 0     | 0.002 | 0.007 | 0     | 0     |
| 171           | 0     | 0.007 | 0     | 0     | 0     | 0     | 0     |
| <hr/>         |       |       |       |       |       |       |       |
| <b>D7S820</b> | 56**  | 77    | 88**  | 635   | 216   | 101   | 89    |
| <hr/>         |       |       |       |       |       |       |       |
| 255           | 0     | 0     | 0     | 0     | 0.002 | 0     | 0     |
| 259           | 0.045 | 0     | 0     | 0.016 | 0.007 | 0.02  | 0.022 |
| 262           | 0     | 0.006 | 0     | 0     | 0     | 0     | 0     |
| 263           | 0.152 | 0.253 | 0.063 | 0.167 | 0.211 | 0.114 | 0.107 |
| 267           | 0.116 | 0.071 | 0     | 0.15  | 0.134 | 0.104 | 0.09  |
| 268           | 0     | 0     | 0     | 0.001 | 0     | 0     | 0.006 |
| 270           | 0     | 0.006 | 0     | 0     | 0     | 0     | 0     |
| 271           | 0.313 | 0.312 | 0.159 | 0.272 | 0.329 | 0.312 | 0.309 |
| 275           | 0.223 | 0.227 | 0.352 | 0.217 | 0.211 | 0.267 | 0.281 |
| 276           | 0     | 0     | 0     | 0     | 0     | 0     | 0     |
| 279           | 0.134 | 0.104 | 0.33  | 0.134 | 0.095 | 0.144 | 0.152 |
| 283           | 0.018 | 0.013 | 0.091 | 0.039 | 0.009 | 0.03  | 0.034 |
| 287           | 0     | 0.006 | 0.006 | 0.004 | 0.002 | 0.01  | 0     |
| 291           | 0     | 0     | 0     | 0     | 0     | 0     | 0     |
| <hr/>         |       |       |       |       |       |       |       |
| <b>D8S117</b> | 59    | 74    | 87    | 648   | 227   | 102   | 89    |
| <hr/>         |       |       |       |       |       |       |       |
| 124           | 0.025 | 0     | 0     | 0.02  | 0.002 | 0.01  | 0.011 |
| 128           | 0     | 0     | 0     | 0.014 | 0.009 | 0.015 | 0.011 |
| 132           | 0.076 | 0.02  | 0.04  | 0.098 | 0.024 | 0.088 | 0.062 |
| 136           | 0.059 | 0.027 | 0.069 | 0.063 | 0.042 | 0.069 | 0.073 |
| 140           | 0.119 | 0.095 | 0.109 | 0.128 | 0.15  | 0.103 | 0.129 |
| 144           | 0.22  | 0.128 | 0.454 | 0.343 | 0.174 | 0.299 | 0.281 |
| 148           | 0.347 | 0.405 | 0.213 | 0.202 | 0.324 | 0.201 | 0.258 |
| 152           | 0.127 | 0.209 | 0.092 | 0.105 | 0.203 | 0.181 | 0.124 |

|               |           |           |                       |            |            |            |           |
|---------------|-----------|-----------|-----------------------|------------|------------|------------|-----------|
| 156           | 0.025     | 0.095     | 0.023                 | 0.024      | 0.064      | 0.029      | 0.051     |
| 160           | 0         | 0.02      | 0                     | 0.004      | 0.009      | 0.005      | 0         |
| <b>D13S31</b> | <b>58</b> | <b>77</b> | <b>88<sup>*</sup></b> | <b>649</b> | <b>228</b> | <b>102</b> | <b>88</b> |
| 212           | 0         | 0         | 0                     | 0.002      | 0          | 0          | 0         |
| 216           | 0.207     | 0         | 0.028                 | 0.126      | 0.013      | 0.093      | 0.125     |
| 220           | 0.017     | 0         | 0.341                 | 0.079      | 0.018      | 0.088      | 0.148     |
| 224           | 0.06      | 0.019     | 0.119                 | 0.067      | 0.029      | 0.078      | 0.085     |
| 228           | 0.267     | 0.357     | 0.142                 | 0.337      | 0.281      | 0.245      | 0.261     |
| 232           | 0.302     | 0.383     | 0.153                 | 0.259      | 0.447      | 0.324      | 0.199     |
| 236           | 0.103     | 0.182     | 0.108                 | 0.094      | 0.156      | 0.118      | 0.131     |
| 240           | 0.043     | 0.058     | 0.102                 | 0.035      | 0.057      | 0.054      | 0.051     |
| 244           | 0         | 0         | 0.006                 | 0.001      | 0          | 0          | 0         |
| <b>D16S53</b> | <b>56</b> | <b>76</b> | <b>87</b>             | <b>644</b> | <b>226</b> | <b>102</b> | <b>89</b> |
| 264           | 0         | 0.02      | 0                     | 0.025      | 0.027      | 0.044      | 0.011     |
| 268           | 0.125     | 0.184     | 0.086                 | 0.12       | 0.188      | 0.191      | 0.107     |
| 272           | 0.027     | 0.105     | 0.264                 | 0.06       | 0.139      | 0.078      | 0.152     |
| 276           | 0.295     | 0.211     | 0.264                 | 0.306      | 0.263      | 0.26       | 0.315     |
| 280           | 0.321     | 0.27      | 0.287                 | 0.3        | 0.221      | 0.27       | 0.298     |
| 284           | 0.223     | 0.178     | 0.08                  | 0.161      | 0.142      | 0.132      | 0.118     |
| 288           | 0.009     | 0.033     | 0.017                 | 0.027      | 0.02       | 0.025      | 0         |
| 292           | 0         | 0         | 0                     | 0.001      | 0          | 0          | 0         |
| <b>D18S51</b> | <b>56</b> | <b>78</b> | <b>88</b>             | <b>640</b> | <b>217</b> | <b>99</b>  | <b>89</b> |
| 271           | 0         | 0         | 0.011                 | 0.001      | 0          | 0          | 0         |
| 275           | 0.009     | 0         | 0                     | 0.006      | 0.005      | 0.01       | 0.011     |
| 277           | 0         | 0         | 0                     | 0          | 0.002      | 0          | 0.006     |
| 279           | 0.009     | 0.019     | 0                     | 0.009      | 0.007      | 0.005      | 0.006     |
| 283           | 0.152     | 0.045     | 0.102                 | 0.152      | 0.065      | 0.121      | 0.152     |
| 287           | 0.188     | 0.064     | 0.136                 | 0.114      | 0.044      | 0.106      | 0.146     |
| 289           | 0         | 0         | 0                     | 0          | 0.005      | 0          | 0         |
| 291           | 0.143     | 0.064     | 0.193                 | 0.165      | 0.065      | 0.146      | 0.14      |
| 295           | 0.134     | 0.147     | 0.165                 | 0.138      | 0.152      | 0.177      | 0.146     |
| 299           | 0.107     | 0.147     | 0.04                  | 0.136      | 0.168      | 0.157      | 0.09      |
| 303           | 0.143     | 0.212     | 0.176                 | 0.128      | 0.166      | 0.121      | 0.112     |
| 307           | 0.08      | 0.167     | 0.108                 | 0.075      | 0.115      | 0.061      | 0.107     |
| 311           | 0         | 0.058     | 0.006                 | 0.038      | 0.108      | 0.056      | 0.039     |
| 315           | 0.027     | 0.045     | 0.017                 | 0.023      | 0.062      | 0.035      | 0.034     |
| 319           | 0         | 0.006     | 0.017                 | 0.01       | 0.025      | 0          | 0         |
| 321           | 0         | 0         | 0                     | 0          | 0.002      | 0          | 0         |
| 323           | 0         | 0.019     | 0.017                 | 0.002      | 0.007      | 0.005      | 0.006     |
| 327           | 0         | 0         | 0.011                 | 0.003      | 0.002      | 0          | 0         |
| 331           | 0.009     | 0.006     | 0                     | 0          | 0          | 0          | 0.006     |
| 339           | 0         | 0         | 0                     | 0          | 0          | 0          | 0         |

| <b>D19S43</b> | 59    | 77    | 87    | 647   | 226   | 102   | 88    |
|---------------|-------|-------|-------|-------|-------|-------|-------|
| 97            | 0     | 0     | 0     | 0     | 0.002 | 0     | 0     |
| 101           | 0     | 0     | 0     | 0     | 0.002 | 0     | 0     |
| 105           | 0     | 0.013 | 0     | 0     | 0.004 | 0     | 0     |
| 109           | 0.017 | 0.071 | 0     | 0.004 | 0.055 | 0.025 | 0     |
| 111           | 0     | 0.006 | 0     | 0.001 | 0     | 0     | 0.006 |
| 113           | 0.119 | 0.162 | 0     | 0.096 | 0.131 | 0.108 | 0.057 |
| 115           | 0     | 0.058 | 0.017 | 0.003 | 0.033 | 0.015 | 0.011 |
| 117           | 0.297 | 0.299 | 0.092 | 0.218 | 0.274 | 0.206 | 0.148 |
| 119           | 0.034 | 0.032 | 0.167 | 0.009 | 0.038 | 0.02  | 0.097 |
| 121           | 0.28  | 0.169 | 0.259 | 0.355 | 0.221 | 0.309 | 0.301 |
| 123           | 0.017 | 0.065 | 0.046 | 0.019 | 0.053 | 0.054 | 0.045 |
| 125           | 0.153 | 0.071 | 0.161 | 0.173 | 0.066 | 0.142 | 0.193 |
| 127           | 0.042 | 0.019 | 0.19  | 0.055 | 0.06  | 0.078 | 0.074 |
| 129           | 0.025 | 0     | 0.023 | 0.045 | 0.029 | 0.025 | 0.04  |
| 131           | 0.008 | 0.019 | 0.04  | 0.018 | 0.029 | 0.02  | 0.023 |
| 133           | 0     | 0     | 0.006 | 0.004 | 0     | 0     | 0.006 |
| 135           | 0.008 | 0.006 | 0     | 0.002 | 0.002 | 0     | 0     |
| 139           | 0     | 0.006 | 0     | 0     | 0     | 0     | 0     |

| <b>D21S11</b> | 59    | 78    | 88    | 648   | 226   | 101   | 89    |
|---------------|-------|-------|-------|-------|-------|-------|-------|
| 186           | 0     | 0     | 0     | 0.001 | 0     | 0     | 0     |
| 192           | 0     | 0     | 0     | 0.001 | 0.002 | 0     | 0     |
| 194           | 0     | 0     | 0     | 0.001 | 0     | 0     | 0.006 |
| 196           | 0     | 0.032 | 0.006 | 0.044 | 0.077 | 0.01  | 0.017 |
| 200           | 0.161 | 0.282 | 0.017 | 0.164 | 0.237 | 0.139 | 0.09  |
| 202           | 0     | 0.013 | 0     | 0.001 | 0     | 0     | 0     |
| 204           | 0.254 | 0.212 | 0.222 | 0.201 | 0.215 | 0.233 | 0.264 |
| 206           | 0     | 0     | 0     | 0.002 | 0     | 0     | 0     |
| 208           | 0.237 | 0.154 | 0.205 | 0.251 | 0.144 | 0.193 | 0.253 |
| 210           | 0.017 | 0.006 | 0.011 | 0.037 | 0.024 | 0.079 | 0.017 |
| 211           | 0     | 0     | 0     | 0     | 0     | 0     | 0     |
| 212           | 0.076 | 0.083 | 0.148 | 0.072 | 0.071 | 0.094 | 0.079 |
| 214           | 0.093 | 0.026 | 0.142 | 0.098 | 0.049 | 0.149 | 0.129 |
| 216           | 0.008 | 0     | 0.023 | 0.015 | 0.018 | 0     | 0.006 |
| 218           | 0.093 | 0.096 | 0.148 | 0.087 | 0.066 | 0.064 | 0.101 |
| 220           | 0     | 0     | 0.006 | 0.001 | 0.004 | 0     | 0     |
| 222           | 0.059 | 0.045 | 0.063 | 0.02  | 0.033 | 0.03  | 0.022 |
| 224           | 0     | 0     | 0     | 0     | 0.015 | 0     | 0     |
| 226           | 0     | 0     | 0.011 | 0.005 | 0.002 | 0     | 0.011 |
| 228           | 0     | 0.038 | 0     | 0.001 | 0.033 | 0.01  | 0.006 |
| 230           | 0     | 0     | 0     | 0     | 0.002 | 0     | 0     |
| 232           | 0     | 0.013 | 0     | 0     | 0.007 | 0     | 0     |
| 234           | 0     | 0     | 0     | 0.001 | 0     | 0     | 0     |

| <b>FGA</b> | 58    | 77    | 87    | 643   | 226   | 102** | 89    |
|------------|-------|-------|-------|-------|-------|-------|-------|
| 206        | 0     | 0     | 0     | 0.001 | 0     | 0     | 0     |
| 210        | 0     | 0     | 0     | 0.002 | 0.007 | 0     | 0     |
| 214        | 0.009 | 0     | 0     | 0.002 | 0.002 | 0     | 0     |
| 218        | 0.009 | 0.006 | 0.006 | 0.014 | 0.004 | 0.01  | 0.017 |
| 220        | 0     | 0.019 | 0     | 0     | 0.013 | 0     | 0     |
| 222        | 0.069 | 0.052 | 0.172 | 0.071 | 0.066 | 0.059 | 0.101 |
| 224        | 0     | 0.013 | 0     | 0     | 0.004 | 0     | 0     |
| 226        | 0.121 | 0.065 | 0.063 | 0.135 | 0.035 | 0.118 | 0.096 |
| 228        | 0     | 0     | 0     | 0.002 | 0.002 | 0     | 0     |
| 230        | 0.19  | 0.11  | 0.109 | 0.15  | 0.133 | 0.162 | 0.152 |
| 232        | 0     | 0     | 0     | 0.002 | 0.002 | 0     | 0     |
| 234        | 0.155 | 0.169 | 0.121 | 0.198 | 0.181 | 0.157 | 0.112 |
| 236        | 0.017 | 0     | 0     | 0.012 | 0.002 | 0.01  | 0     |
| 238        | 0.129 | 0.253 | 0.086 | 0.152 | 0.146 | 0.147 | 0.129 |
| 240        | 0.009 | 0     | 0.011 | 0.005 | 0     | 0     | 0     |
| 242        | 0.155 | 0.123 | 0.138 | 0.138 | 0.173 | 0.147 | 0.18  |
| 244        | 0.009 | 0     | 0.006 | 0.001 | 0     | 0     | 0     |
| 245        | 0     | 0     | 0     | 0     | 0.002 | 0     | 0     |
| 246        | 0.095 | 0.078 | 0.155 | 0.075 | 0.104 | 0.098 | 0.135 |
| 250        | 0.026 | 0.032 | 0.115 | 0.03  | 0.049 | 0.054 | 0.039 |
| 254        | 0.009 | 0.032 | 0.011 | 0.007 | 0.029 | 0.039 | 0.028 |
| 258        | 0     | 0.045 | 0.006 | 0.002 | 0.033 | 0     | 0.006 |
| 262        | 0     | 0     | 0     | 0.001 | 0.004 | 0     | 0.006 |
| 266        | 0     | 0     | 0     | 0     | 0.002 | 0     | 0     |
| 268        | 0     | 0     | 0     | 0     | 0.004 | 0     | 0     |

  

| <b>TH01</b> | 59    | 73    | 87    | 645   | 226   | 102   | 89    |
|-------------|-------|-------|-------|-------|-------|-------|-------|
| 167         | 0     | 0     | 0     | 0.002 | 0.007 | 0     | 0     |
| 171         | 0.212 | 0.075 | 0.299 | 0.236 | 0.164 | 0.201 | 0.236 |
| 175         | 0.161 | 0.37  | 0.443 | 0.173 | 0.389 | 0.25  | 0.32  |
| 179         | 0.102 | 0.288 | 0.006 | 0.099 | 0.219 | 0.132 | 0.112 |
| 182         | 0     | 0     | 0     | 0.001 | 0     | 0     | 0     |
| 183         | 0.186 | 0.212 | 0.011 | 0.157 | 0.144 | 0.216 | 0.107 |
| 186         | 0.331 | 0.055 | 0.241 | 0.317 | 0.071 | 0.201 | 0.219 |
| 187         | 0.008 | 0     | 0     | 0.014 | 0.007 | 0     | 0.006 |
| 191         | 0     | 0     | 0     | 0.001 | 0     | 0     | 0     |

  

| <b>TPOX</b> | 59    | 75    | 87    | 646   | 223   | 102   | 88    |
|-------------|-------|-------|-------|-------|-------|-------|-------|
| 218         | 0.008 | 0     | 0     | 0     | 0     | 0     | 0     |
| 222         | 0     | 0.093 | 0     | 0.002 | 0.061 | 0.015 | 0.006 |
| 226         | 0     | 0.02  | 0     | 0.004 | 0.022 | 0.005 | 0     |
| 230         | 0.466 | 0.333 | 0.506 | 0.543 | 0.365 | 0.451 | 0.466 |

|     |       |       |       |       |       |       |       |
|-----|-------|-------|-------|-------|-------|-------|-------|
| 234 | 0.144 | 0.18  | 0.023 | 0.104 | 0.206 | 0.088 | 0.108 |
| 238 | 0.059 | 0.12  | 0.017 | 0.053 | 0.092 | 0.039 | 0.057 |
| 242 | 0.297 | 0.24  | 0.236 | 0.261 | 0.224 | 0.304 | 0.278 |
| 246 | 0.025 | 0.013 | 0.213 | 0.032 | 0.029 | 0.083 | 0.08  |
| 250 | 0     | 0     | 0.006 | 0.001 | 0     | 0.005 | 0.006 |
| 254 | 0     | 0     | 0     | 0     | 0     | 0.01  | 0     |

| <b>vWA</b> | <b>58</b> | <b>76</b> | <b>87</b> | <b>649</b> | <b>227</b> | <b>102</b> | <b>88</b> |
|------------|-----------|-----------|-----------|------------|------------|------------|-----------|
| 154        | 0         | 0.013     | 0         | 0          | 0.004      | 0          | 0         |
| 158        | 0         | 0         | 0         | 0          | 0.002      | 0          | 0         |
| 162        | 0         | 0.02      | 0         | 0.003      | 0.022      | 0.015      | 0         |
| 166        | 0.103     | 0.059     | 0.04      | 0.11       | 0.068      | 0.093      | 0.068     |
| 170        | 0.155     | 0.151     | 0.034     | 0.102      | 0.26       | 0.098      | 0.108     |
| 174        | 0.233     | 0.23      | 0.466     | 0.213      | 0.244      | 0.225      | 0.273     |
| 178        | 0.259     | 0.224     | 0.316     | 0.267      | 0.185      | 0.294      | 0.301     |
| 182        | 0.164     | 0.118     | 0.103     | 0.206      | 0.13       | 0.196      | 0.21      |
| 186        | 0.078     | 0.132     | 0.034     | 0.085      | 0.064      | 0.054      | 0.04      |
| 190        | 0.009     | 0.053     | 0         | 0.014      | 0.018      | 0.02       | 0         |
| 194        | 0         | 0         | 0.006     | 0.001      | 0.002      | 0.005      | 0         |
| 226        | 0         | 0.02      | 0         | 0.004      | 0.022      | 0.005      | 0         |
| 230        | 0.466     | 0.333     | 0.506     | 0.543      | 0.365      | 0.451      | 0.466     |
| 234        | 0.144     | 0.18      | 0.023     | 0.104      | 0.206      | 0.088      | 0.108     |
| 238        | 0.059     | 0.12      | 0.017     | 0.053      | 0.092      | 0.039      | 0.057     |
| 242        | 0.297     | 0.24      | 0.236     | 0.261      | 0.224      | 0.304      | 0.278     |
| 246        | 0.025     | 0.013     | 0.213     | 0.032      | 0.029      | 0.083      | 0.08      |
| 250        | 0         | 0         | 0.006     | 0.001      | 0          | 0.005      | 0.006     |
| 254        | 0         | 0         | 0         | 0          | 0          | 0.01       | 0         |

| <b>D2S319</b> | <b>0</b> | <b>0</b> | <b>0</b> | <b>642</b> | <b>222</b> | <b>68</b> | <b>0</b> |
|---------------|----------|----------|----------|------------|------------|-----------|----------|
| 120           | na       | na       | na       | 0.001      | 0.007      | 0         | na       |
| 126           | na       | na       | na       | 0.13       | 0.135      | 0.147     | na       |
| 128           | na       | na       | na       | 0.038      | 0.083      | 0.066     | na       |
| 130           | na       | na       | na       | 0.342      | 0.275      | 0.368     | na       |
| 132           | na       | na       | na       | 0.271      | 0.104      | 0.191     | na       |
| 134           | na       | na       | na       | 0.208      | 0.36       | 0.228     | na       |
| 136           | na       | na       | na       | 0.01       | 0.036      | 0         | na       |

| <b>D17S79</b> | <b>59</b> | <b>78</b> | <b>88</b> | <b>636</b> | <b>213</b> | <b>101</b> | <b>88</b> |
|---------------|-----------|-----------|-----------|------------|------------|------------|-----------|
| 185           | 0.008     | 0.019     | 0         | 0.002      | 0.007      | 0.005      | 0         |
| 187           | 0.008     | 0.109     | 0         | 0.005      | 0.15       | 0.045      | 0.023     |
| 189           | 0.398     | 0.09      | 0.023     | 0.353      | 0.167      | 0.287      | 0.239     |
| 191           | 0.017     | 0.032     | 0         | 0.007      | 0.031      | 0.045      | 0.006     |



|               |           |           |           |            |            |            |             |
|---------------|-----------|-----------|-----------|------------|------------|------------|-------------|
| 193           | 0.042     | 0.34      | 0.017     | 0.048      | 0.218      | 0.099      | 0.074       |
| 195           | 0.186     | 0.103     | 0.148     | 0.257      | 0.11       | 0.134      | 0.216       |
| 197           | 0.025     | 0.109     | 0.023     | 0.029      | 0.113      | 0.035      | 0.034       |
| 199           | 0.22      | 0.154     | 0.761     | 0.185      | 0.153      | 0.272      | 0.335       |
| 201           | 0.017     | 0.032     | 0         | 0.024      | 0.026      | 0.035      | 0.04        |
| 203           | 0.076     | 0.013     | 0.028     | 0.087      | 0.026      | 0.045      | 0.034       |
| 205           | 0         | 0         | 0         | 0.002      | 0          | 0          | 0           |
| 207           | 0         | 0         | 0         | 0          | 0          | 0          | 0           |
| <hr/>         |           |           |           |            |            |            |             |
| <b>D8S272</b> | <b>49</b> | <b>74</b> | <b>88</b> | <b>629</b> | <b>217</b> | <b>97</b>  | <b>84**</b> |
| 235           | 0         | 0         | 0         | 0          | 0.002      | 0.005      | 0.006       |
| 237           | 0.02      | 0.074     | 0.148     | 0.034      | 0.048      | 0.036      | 0.077       |
| 239           | 0         | 0         | 0         | 0.001      | 0.002      | 0.005      | 0           |
| 241           | 0.092     | 0.034     | 0.006     | 0.122      | 0.051      | 0.015      | 0.083       |
| 243           | 0         | 0.054     | 0.011     | 0.01       | 0.025      | 0.026      | 0.03        |
| 245           | 0.388     | 0.034     | 0.222     | 0.398      | 0.134      | 0.361      | 0.274       |
| 247           | 0.082     | 0.236     | 0.023     | 0.054      | 0.249      | 0.17       | 0.083       |
| 249           | 0.031     | 0.047     | 0.119     | 0.01       | 0.065      | 0.052      | 0.042       |
| 251           | 0.214     | 0.196     | 0.415     | 0.184      | 0.157      | 0.186      | 0.232       |
| 253           | 0.041     | 0.122     | 0.04      | 0.027      | 0.108      | 0.052      | 0.042       |
| 254           | 0         | 0         | 0         | 0          | 0.005      | 0          | 0           |
| 255           | 0.071     | 0.169     | 0.017     | 0.111      | 0.118      | 0.041      | 0.077       |
| 257           | 0.051     | 0.034     | 0         | 0.04       | 0.035      | 0.046      | 0.054       |
| 259           | 0.01      | 0         | 0         | 0.006      | 0.002      | 0.005      | 0           |
| 261           | 0         | 0         | 0         | 0.003      | 0          | 0          | 0           |
| <hr/>         |           |           |           |            |            |            |             |
| <b>D1S196</b> | <b>59</b> | <b>78</b> | <b>87</b> | <b>542</b> | <b>220</b> | <b>100</b> | <b>89</b>   |
| 320           | 0.39      | 0.34      | 0.425     | 0.351      | 0.339      | 0.275      | 0.331       |
| 322           | 0.025     | 0         | 0.017     | 0.018      | 0.016      | 0.005      | 0.006       |
| 324           | 0         | 0         | 0         | 0          | 0.007      | 0          | 0.006       |
| 326           | 0.169     | 0.019     | 0.253     | 0.241      | 0.075      | 0.205      | 0.242       |
| 328           | 0.102     | 0.16      | 0.04      | 0.072      | 0.093      | 0.095      | 0.073       |
| 330           | 0.212     | 0.346     | 0.253     | 0.216      | 0.343      | 0.275      | 0.242       |
| 332           | 0.102     | 0.058     | 0.011     | 0.097      | 0.08       | 0.125      | 0.096       |
| 334           | 0         | 0.077     | 0         | 0.006      | 0.041      | 0.02       | 0.006       |
| 336           | 0         | 0         | 0         | 0          | 0.007      | 0          | 0           |
| <hr/>         |           |           |           |            |            |            |             |
| <b>D7S640</b> | <b>53</b> | <b>63</b> | <b>65</b> | <b>615</b> | <b>200</b> | <b>95</b>  | <b>65*</b>  |
| 104           | 0         | 0         | 0         | 0.001      | 0          | 0.016      | 0           |
| 106           | 0         | 0.167     | 0         | 0.001      | 0.065      | 0.016      | 0           |
| 108           | 0         | 0.016     | 0         | 0.002      | 0.018      | 0          | 0.008       |
| 110           | 0.028     | 0.048     | 0         | 0.001      | 0          | 0          | 0.008       |
| 112           | 0.009     | 0.103     | 0         | 0.008      | 0.135      | 0.053      | 0.023       |

|     |       |       |       |       |       |       |       |
|-----|-------|-------|-------|-------|-------|-------|-------|
| 114 | 0.038 | 0     | 0.031 | 0.033 | 0.013 | 0.021 | 0.015 |
| 116 | 0.217 | 0.04  | 0.177 | 0.189 | 0.113 | 0.168 | 0.238 |
| 118 | 0.104 | 0.04  | 0.023 | 0.063 | 0.05  | 0.084 | 0.069 |
| 120 | 0.179 | 0.048 | 0.031 | 0.174 | 0.058 | 0.132 | 0.092 |
| 122 | 0.16  | 0.103 | 0.138 | 0.183 | 0.135 | 0.1   | 0.185 |
| 124 | 0.113 | 0.079 | 0.023 | 0.123 | 0.073 | 0.137 | 0.1   |
| 126 | 0.047 | 0.063 | 0.023 | 0.081 | 0.083 | 0.053 | 0.038 |
| 128 | 0.057 | 0.135 | 0.077 | 0.045 | 0.063 | 0.068 | 0.046 |
| 130 | 0     | 0.063 | 0.008 | 0.02  | 0.05  | 0.026 | 0.038 |
| 132 | 0.009 | 0.063 | 0.1   | 0.019 | 0.055 | 0.021 | 0.038 |
| 134 | 0     | 0.024 | 0.238 | 0.01  | 0.053 | 0.047 | 0.046 |
| 136 | 0.028 | 0     | 0.054 | 0.015 | 0.018 | 0.026 | 0.031 |
| 138 | 0.009 | 0.008 | 0.023 | 0.015 | 0.015 | 0.005 | 0.023 |
| 140 | 0     | 0     | 0.046 | 0.008 | 0.005 | 0.021 | 0     |
| 142 | 0     | 0     | 0.008 | 0.005 | 0.003 | 0.005 | 0     |
| 144 | 0     | 0     | 0     | 0.003 | 0     | 0     | 0     |
| 146 | 0     | 0     | 0     | 0.001 | 0     | 0     | 0     |

| <b>D8S182</b> | <b>59**</b> | <b>78</b> | <b>88</b> | <b>643</b> | <b>226</b> | <b>101</b> | <b>88</b> |
|---------------|-------------|-----------|-----------|------------|------------|------------|-----------|
| 154           | 0           | 0.006     | 0         | 0          | 0.002      | 0          | 0         |
| 156           | 0.068       | 0.019     | 0.153     | 0.053      | 0.027      | 0.059      | 0.068     |
| 158           | 0.034       | 0.378     | 0.006     | 0.031      | 0.33       | 0.109      | 0.057     |
| 160           | 0.475       | 0.173     | 0.511     | 0.541      | 0.23       | 0.47       | 0.528     |
| 162           | 0.076       | 0.103     | 0.006     | 0.034      | 0.075      | 0.054      | 0.023     |
| 164           | 0.322       | 0.263     | 0.324     | 0.31       | 0.263      | 0.282      | 0.295     |
| 166           | 0.025       | 0.051     | 0         | 0.03       | 0.073      | 0.02       | 0.023     |
| 168           | 0           | 0.006     | 0         | 0          | 0          | 0.005      | 0.006     |

| <b>D7S657</b> | <b>38</b> | <b>66</b> | <b>82</b> | <b>623**</b> | <b>214</b> | <b>95</b> | <b>77</b> |
|---------------|-----------|-----------|-----------|--------------|------------|-----------|-----------|
| 246           | 0         | 0.076     | 0         | 0.001        | 0.075      | 0.016     | 0.006     |
| 248           | 0.079     | 0.174     | 0.018     | 0.059        | 0.131      | 0.058     | 0.045     |
| 250           | 0.039     | 0.462     | 0.28      | 0.055        | 0.376      | 0.179     | 0.201     |
| 252           | 0.184     | 0.265     | 0.183     | 0.185        | 0.241      | 0.237     | 0.253     |
| 254           | 0.066     | 0         | 0         | 0.039        | 0.035      | 0.037     | 0         |
| 256           | 0         | 0.008     | 0         | 0.007        | 0.019      | 0.011     | 0         |
| 258           | 0.066     | 0         | 0.018     | 0.045        | 0.012      | 0.042     | 0.052     |
| 260           | 0.092     | 0.008     | 0.183     | 0.1          | 0.035      | 0.105     | 0.117     |
| 262           | 0.395     | 0         | 0.177     | 0.408        | 0.056      | 0.253     | 0.24      |
| 264           | 0.066     | 0.008     | 0.079     | 0.089        | 0.016      | 0.053     | 0.071     |
| 266           | 0.013     | 0         | 0.055     | 0.007        | 0.005      | 0.011     | 0.013     |
| 268           | 0         | 0         | 0.006     | 0.002        | 0          | 0         | 0         |
| 270           | 0         | 0         | 0         | 0.002        | 0          | 0         | 0         |
| 272           | 0         | 0         | 0         | 0.001        | 0          | 0         | 0         |

274      0      0      0      0      0      0      0

| <b>D22S27</b> | 59    | 77    | 87    | 642   | 218   | 100   | 88    |
|---------------|-------|-------|-------|-------|-------|-------|-------|
| 272           | 0.008 | 0.052 | 0.029 | 0.002 | 0.089 | 0.02  | 0.028 |
| 274           | 0     | 0     | 0     | 0     | 0     | 0     | 0     |
| 276           | 0     | 0     | 0     | 0.001 | 0     | 0     | 0     |
| 278           | 0     | 0.032 | 0     | 0.007 | 0     | 0.03  | 0     |
| 280           | 0.102 | 0.143 | 0.04  | 0.102 | 0.126 | 0.105 | 0.131 |
| 282           | 0.347 | 0.045 | 0.109 | 0.275 | 0.112 | 0.14  | 0.199 |
| 284           | 0.22  | 0.377 | 0.287 | 0.303 | 0.335 | 0.365 | 0.29  |
| 286           | 0.102 | 0.065 | 0.236 | 0.095 | 0.096 | 0.11  | 0.142 |
| 288           | 0.102 | 0.11  | 0.253 | 0.104 | 0.103 | 0.14  | 0.114 |
| 290           | 0.119 | 0.143 | 0.046 | 0.098 | 0.119 | 0.075 | 0.08  |
| 292           | 0     | 0.013 | 0     | 0.009 | 0.005 | 0.015 | 0.017 |
| 294           | 0     | 0.019 | 0     | 0.003 | 0.014 | 0     | 0     |
| 296           | 0     | 0     | 0     | 0     | 0     | 0     | 0     |

| <b>D14S68</b> | 53    | 58**  | 83    | 522   | 158   | 85    | 70    |
|---------------|-------|-------|-------|-------|-------|-------|-------|
| 308           | 0     | 0     | 0     | 0.001 | 0     | 0     | 0     |
| 310           | 0     | 0.103 | 0     | 0     | 0.019 | 0     | 0.007 |
| 312           | 0     | 0.078 | 0     | 0     | 0.006 | 0.006 | 0.021 |
| 314           | 0     | 0.052 | 0     | 0.001 | 0.114 | 0.006 | 0     |
| 316           | 0.009 | 0     | 0.006 | 0.016 | 0.019 | 0     | 0.007 |
| 318           | 0.142 | 0.078 | 0.181 | 0.128 | 0.079 | 0.159 | 0.093 |
| 320           | 0.075 | 0.069 | 0.036 | 0.049 | 0.117 | 0.094 | 0.1   |
| 322           | 0.038 | 0.043 | 0.012 | 0.049 | 0.047 | 0.024 | 0.043 |
| 324           | 0.311 | 0.25  | 0.488 | 0.307 | 0.285 | 0.253 | 0.336 |
| 326           | 0.17  | 0.216 | 0.09  | 0.187 | 0.199 | 0.2   | 0.114 |
| 328           | 0.132 | 0.078 | 0.084 | 0.116 | 0.07  | 0.124 | 0.1   |
| 330           | 0.113 | 0.017 | 0.084 | 0.103 | 0.028 | 0.094 | 0.136 |
| 332           | 0.009 | 0.017 | 0.018 | 0.035 | 0.016 | 0.035 | 0.036 |
| 334           | 0     | 0     | 0     | 0.006 | 0     | 0.006 | 0.007 |
| 336           | 0     | 0     | 0     | 0.001 | 0     | 0     | 0     |

| <b>D5S407</b> | 58    | 78    | 88    | 575   | 225   | 102   | 89    |
|---------------|-------|-------|-------|-------|-------|-------|-------|
| 84            | 0.19  | 0.051 | 0.148 | 0.157 | 0.033 | 0.152 | 0.135 |
| 86            | 0.026 | 0.045 | 0     | 0.017 | 0.062 | 0     | 0.017 |
| 88            | 0.112 | 0.237 | 0.216 | 0.121 | 0.242 | 0.142 | 0.157 |
| 90            | 0.043 | 0.045 | 0.011 | 0.035 | 0.024 | 0.025 | 0.017 |
| 92            | 0.009 | 0.109 | 0.006 | 0.03  | 0.1   | 0.059 | 0.034 |
| 94            | 0.095 | 0.071 | 0.006 | 0.096 | 0.062 | 0.049 | 0.045 |
| 96            | 0.06  | 0.064 | 0.006 | 0.054 | 0.062 | 0.074 | 0.039 |

|     |       |       |       |       |       |       |       |
|-----|-------|-------|-------|-------|-------|-------|-------|
| 98  | 0.103 | 0.128 | 0.176 | 0.158 | 0.129 | 0.093 | 0.18  |
| 100 | 0.198 | 0.122 | 0.074 | 0.208 | 0.138 | 0.196 | 0.18  |
| 102 | 0.155 | 0.026 | 0.176 | 0.098 | 0.042 | 0.137 | 0.079 |
| 104 | 0.009 | 0.096 | 0.051 | 0.017 | 0.069 | 0.034 | 0.028 |
| 106 | 0     | 0.006 | 0.097 | 0.007 | 0.016 | 0.025 | 0.073 |
| 108 | 0     | 0     | 0.034 | 0.003 | 0.016 | 0.015 | 0     |
| 110 | 0     | 0     | 0     | 0.001 | 0.004 | 0     | 0.017 |
| 112 | 0     | 0     | 0     | 0     | 0     | 0     | 0     |

| <b>D2S162</b> | 59    | 78    | 88    | 625   | 219   | 100   | 87    |
|---------------|-------|-------|-------|-------|-------|-------|-------|
| 114           | 0     | 0.019 | 0     | 0     | 0.021 | 0     | 0     |
| 116           | 0     | 0     | 0.08  | 0.001 | 0.005 | 0.045 | 0.029 |
| 118           | 0.008 | 0.006 | 0.006 | 0     | 0.005 | 0     | 0     |
| 120           | 0.051 | 0.186 | 0.034 | 0.109 | 0.114 | 0.12  | 0.069 |
| 122           | 0     | 0.026 | 0     | 0.007 | 0.016 | 0.005 | 0     |
| 124           | 0     | 0.103 | 0     | 0.001 | 0.082 | 0.015 | 0.006 |
| 126           | 0     | 0.135 | 0     | 0.004 | 0.105 | 0.02  | 0.017 |
| 128           | 0.11  | 0.077 | 0.017 | 0.042 | 0.155 | 0.06  | 0.029 |
| 130           | 0.059 | 0.115 | 0.011 | 0.056 | 0.089 | 0.07  | 0.069 |
| 132           | 0.322 | 0.205 | 0.375 | 0.322 | 0.221 | 0.3   | 0.385 |
| 134           | 0.127 | 0.083 | 0.148 | 0.146 | 0.119 | 0.12  | 0.121 |
| 136           | 0.127 | 0.019 | 0.108 | 0.109 | 0.018 | 0.065 | 0.08  |
| 138           | 0.051 | 0.006 | 0.045 | 0.046 | 0.021 | 0.06  | 0.029 |
| 140           | 0.11  | 0.013 | 0.125 | 0.121 | 0.025 | 0.09  | 0.132 |
| 142           | 0.025 | 0     | 0.034 | 0.019 | 0.002 | 0.03  | 0.023 |
| 144           | 0.008 | 0.006 | 0.017 | 0.011 | 0.002 | 0     | 0.011 |
| 146           | 0     | 0     | 0     | 0.003 | 0     | 0     | 0     |
| 148           | 0     | 0     | 0     | 0.002 | 0     | 0     | 0     |

| <b>D10S19</b> | 59    | 78    | 88    | 638   | 227   | 100   | 89    |
|---------------|-------|-------|-------|-------|-------|-------|-------|
| 156           | 0     | 0     | 0     | 0.001 | 0     | 0     | 0     |
| 158           | 0     | 0     | 0.006 | 0     | 0.002 | 0     | 0     |
| 160           | 0     | 0.077 | 0     | 0.002 | 0.046 | 0.005 | 0.017 |
| 162           | 0     | 0.019 | 0     | 0.001 | 0.02  | 0     | 0     |
| 164           | 0.068 | 0.019 | 0     | 0.032 | 0.042 | 0.05  | 0.028 |
| 166           | 0     | 0.09  | 0     | 0.002 | 0.031 | 0.015 | 0.006 |
| 168           | 0.11  | 0.103 | 0.063 | 0.091 | 0.097 | 0.11  | 0.079 |
| 170           | 0.144 | 0.154 | 0.17  | 0.158 | 0.218 | 0.19  | 0.197 |
| 172           | 0.178 | 0.359 | 0.42  | 0.179 | 0.24  | 0.2   | 0.281 |
| 174           | 0.381 | 0.032 | 0.256 | 0.411 | 0.17  | 0.36  | 0.337 |
| 176           | 0.102 | 0.083 | 0.08  | 0.113 | 0.108 | 0.06  | 0.039 |
| 178           | 0.008 | 0.013 | 0     | 0.009 | 0.007 | 0     | 0.011 |

| <b>D11S93</b> | 53    | 77    | 88    | 637** | 221   | 100   | 89    |
|---------------|-------|-------|-------|-------|-------|-------|-------|
| 192           | 0     | 0     | 0.074 | 0.015 | 0     | 0.02  | 0.028 |
| 194           | 0     | 0     | 0.006 | 0     | 0     | 0     | 0     |
| 196           | 0     | 0.091 | 0     | 0.001 | 0.084 | 0.015 | 0.006 |
| 198           | 0     | 0     | 0     | 0.001 | 0     | 0     | 0     |
| 200           | 0.292 | 0.13  | 0.097 | 0.296 | 0.199 | 0.235 | 0.275 |
| 202           | 0.009 | 0.13  | 0.017 | 0.032 | 0.084 | 0.105 | 0.045 |
| 204           | 0.066 | 0.506 | 0.273 | 0.101 | 0.376 | 0.155 | 0.169 |
| 206           | 0.019 | 0.123 | 0.011 | 0.011 | 0.156 | 0.04  | 0.022 |
| 208           | 0.16  | 0.013 | 0.045 | 0.077 | 0.032 | 0.07  | 0.051 |
| 210           | 0.434 | 0.006 | 0.477 | 0.433 | 0.068 | 0.335 | 0.399 |
| 212           | 0.009 | 0     | 0     | 0.031 | 0.002 | 0.025 | 0.006 |
| 214           | 0.009 | 0     | 0     | 0.002 | 0     | 0     | 0     |
| 218           | 0     | 0     | 0     | 0     | 0     | 0     | 0     |

| <b>D9S175</b> | 59    | 77    | 88    | 647   | 223   | 99**  | 88    |
|---------------|-------|-------|-------|-------|-------|-------|-------|
| 251           | 0     | 0     | 0     | 0     | 0     | 0     | 0     |
| 253           | 0     | 0.006 | 0     | 0     | 0     | 0     | 0     |
| 255           | 0     | 0     | 0     | 0.001 | 0     | 0     | 0     |
| 257           | 0     | 0     | 0     | 0.001 | 0     | 0     | 0     |
| 259           | 0.008 | 0     | 0     | 0.007 | 0.002 | 0.01  | 0.006 |
| 261           | 0.347 | 0.071 | 0.199 | 0.331 | 0.083 | 0.242 | 0.301 |
| 263           | 0.127 | 0.045 | 0.432 | 0.146 | 0.052 | 0.172 | 0.267 |
| 265           | 0.051 | 0.026 | 0.063 | 0.076 | 0.056 | 0.04  | 0.051 |
| 267           | 0.153 | 0.097 | 0.085 | 0.138 | 0.209 | 0.146 | 0.097 |
| 269           | 0.017 | 0.071 | 0.006 | 0.044 | 0.074 | 0.025 | 0.006 |
| 271           | 0.025 | 0.221 | 0     | 0.031 | 0.17  | 0.081 | 0.023 |
| 273           | 0.025 | 0.117 | 0     | 0.037 | 0.101 | 0.04  | 0.028 |
| 275           | 0.059 | 0.149 | 0     | 0.053 | 0.121 | 0.071 | 0.045 |
| 277           | 0.076 | 0.091 | 0.011 | 0.043 | 0.034 | 0.051 | 0.04  |
| 279           | 0.093 | 0.045 | 0.006 | 0.053 | 0.045 | 0.051 | 0.051 |
| 281           | 0.017 | 0.019 | 0     | 0.022 | 0.016 | 0.015 | 0     |
| 283           | 0     | 0     | 0     | 0.007 | 0.004 | 0     | 0.011 |
| 285           | 0     | 0     | 0.006 | 0.009 | 0.009 | 0.005 | 0.006 |
| 287           | 0     | 0.006 | 0.193 | 0.002 | 0.009 | 0.045 | 0.063 |
| 289           | 0     | 0     | 0     | 0     | 0     | 0.005 | 0.006 |
| 293           | 0     | 0.006 | 0     | 0     | 0     | 0     | 0     |
| 295           | 0     | 0.006 | 0     | 0     | 0.002 | 0     | 0     |
| 297           | 0     | 0.019 | 0     | 0     | 0.013 | 0     | 0     |

| <b>D5S410</b> | 58 | 78 | 87 | 623 | 215** | 99 | 87 |
|---------------|----|----|----|-----|-------|----|----|
| 323           | 0  | 0  | 0  | 0   | 0     | 0  | 0  |
| 325           | 0  | 0  | 0  | 0   | 0.002 | 0  | 0  |

|     |       |       |       |       |       |       |       |
|-----|-------|-------|-------|-------|-------|-------|-------|
| 329 | 0     | 0.019 | 0     | 0.002 | 0.016 | 0.005 | 0.006 |
| 331 | 0.121 | 0.019 | 0.017 | 0.1   | 0.047 | 0.066 | 0.08  |
| 333 | 0.293 | 0.154 | 0.816 | 0.269 | 0.228 | 0.288 | 0.379 |
| 335 | 0.138 | 0.628 | 0.103 | 0.082 | 0.481 | 0.237 | 0.132 |
| 337 | 0.25  | 0.135 | 0.052 | 0.372 | 0.179 | 0.242 | 0.236 |
| 339 | 0.034 | 0.026 | 0     | 0.021 | 0.021 | 0.035 | 0.023 |
| 341 | 0     | 0.006 | 0     | 0.011 | 0.007 | 0.015 | 0.006 |
| 343 | 0.095 | 0.006 | 0.011 | 0.099 | 0.009 | 0.071 | 0.098 |
| 345 | 0.034 | 0     | 0     | 0.021 | 0.002 | 0.025 | 0.011 |
| 347 | 0.034 | 0.006 | 0     | 0.016 | 0.005 | 0.015 | 0.029 |
| 349 | 0     | 0     | 0     | 0.001 | 0     | 0     | 0     |
| 351 | 0     | 0     | 0     | 0.008 | 0.002 | 0     | 0     |

| <b>D7S246</b> | <i>45</i> | <i>61</i> | <i>70</i> | <i>335</i> | <i>170</i> | <i>74</i> | <i>68</i> |
|---------------|-----------|-----------|-----------|------------|------------|-----------|-----------|
| 116           | 0         | 0         | 0         | 0.001      | 0          | 0         | 0         |
| 118           | 0.044     | 0         | 0         | 0.045      | 0.009      | 0.027     | 0.022     |
| 120           | 0.044     | 0.008     | 0.064     | 0.043      | 0.021      | 0.061     | 0.051     |
| 122           | 0.5       | 0.426     | 0.4       | 0.561      | 0.429      | 0.459     | 0.522     |
| 124           | 0.044     | 0.016     | 0.007     | 0.057      | 0.021      | 0.02      | 0.022     |
| 126           | 0         | 0.082     | 0         | 0.009      | 0.041      | 0.014     | 0         |
| 128           | 0.022     | 0.115     | 0.007     | 0.012      | 0.1        | 0.041     | 0.015     |
| 130           | 0.111     | 0.197     | 0.436     | 0.106      | 0.215      | 0.155     | 0.235     |
| 132           | 0.044     | 0.139     | 0.014     | 0.004      | 0.082      | 0.02      | 0.015     |
| 134           | 0.011     | 0.016     | 0.007     | 0.009      | 0.038      | 0.034     | 0.015     |
| 136           | 0.111     | 0         | 0.05      | 0.051      | 0.015      | 0.081     | 0.059     |
| 138           | 0.067     | 0         | 0         | 0.027      | 0.006      | 0.02      | 0.029     |
| 140           | 0         | 0         | 0.014     | 0.075      | 0.024      | 0.068     | 0.015     |
| 144           | 0         | 0         | 0         | 0          | 0          | 0         | 0         |

| <b>D16S30</b> | <i>30</i> | <i>65<sup>**</sup></i> | <i>85</i> | <i>634</i> | <i>222</i> | <i>100</i> | <i>88</i> |
|---------------|-----------|------------------------|-----------|------------|------------|------------|-----------|
| 151           | 0         | 0                      | 0         | 0.001      | 0          | 0          | 0         |
| 153           | 0         | 0                      | 0         | 0          | 0.002      | 0          | 0         |
| 155           | 0         | 0.077                  | 0         | 0          | 0.05       | 0.005      | 0.006     |
| 157           | 0.017     | 0.123                  | 0         | 0.003      | 0.09       | 0.015      | 0.006     |
| 159           | 0.05      | 0.015                  | 0.012     | 0.016      | 0.034      | 0.025      | 0.023     |
| 161           | 0.167     | 0.108                  | 0.006     | 0.188      | 0.077      | 0.1        | 0.119     |
| 163           | 0.167     | 0.431                  | 0.6       | 0.267      | 0.428      | 0.43       | 0.511     |
| 165           | 0.383     | 0.154                  | 0.135     | 0.342      | 0.146      | 0.2        | 0.21      |
| 166           | 0         | 0                      | 0.041     | 0          | 0          | 0          | 0         |
| 167           | 0.15      | 0.069                  | 0.206     | 0.106      | 0.133      | 0.08       | 0.091     |
| 169           | 0.05      | 0.008                  | 0         | 0.063      | 0.027      | 0.12       | 0.034     |
| 171           | 0.017     | 0.015                  | 0         | 0.009      | 0.011      | 0.015      | 0         |
| 173           | 0         | 0                      | 0         | 0.006      | 0          | 0.01       | 0         |

175      0      0      0      0      0.002      0      0

| <b>D10S17</b> | 56    | 77**  | 85    | 626   | 221   | 101   | 83    |
|---------------|-------|-------|-------|-------|-------|-------|-------|
| 183           | 0     | 0     | 0     | 0.001 | 0     | 0     | 0.012 |
| 185           | 0     | 0.162 | 0.012 | 0.002 | 0.131 | 0.035 | 0.006 |
| 187           | 0.098 | 0.123 | 0.141 | 0.149 | 0.084 | 0.193 | 0.169 |
| 189           | 0.232 | 0.279 | 0.006 | 0.149 | 0.217 | 0.129 | 0.127 |
| 191           | 0.018 | 0.084 | 0.018 | 0.011 | 0.054 | 0.03  | 0.018 |
| 193           | 0.027 | 0.182 | 0.488 | 0.075 | 0.174 | 0.134 | 0.235 |
| 195           | 0.045 | 0.058 | 0.006 | 0.04  | 0.109 | 0.045 | 0.018 |
| 197           | 0.527 | 0.091 | 0.312 | 0.526 | 0.163 | 0.386 | 0.373 |
| 199           | 0.054 | 0.019 | 0.018 | 0.046 | 0.068 | 0.05  | 0.042 |
| 203           | 0     | 0     | 0     | 0.002 | 0     | 0     | 0     |

| <b>D15S10</b> | 59    | 77    | 88    | 630   | 215   | 97    | 88    |
|---------------|-------|-------|-------|-------|-------|-------|-------|
| 208           | 0.034 | 0     | 0     | 0.026 | 0     | 0.015 | 0.034 |
| 210           | 0.398 | 0.104 | 0.244 | 0.361 | 0.133 | 0.247 | 0.318 |
| 212           | 0.144 | 0.078 | 0.193 | 0.101 | 0.056 | 0.062 | 0.114 |
| 214           | 0.034 | 0.013 | 0.017 | 0.01  | 0.037 | 0.005 | 0.006 |
| 216           | 0     | 0.065 | 0     | 0.001 | 0.065 | 0.015 | 0     |
| 218           | 0     | 0.299 | 0     | 0.01  | 0.27  | 0.082 | 0.045 |
| 220           | 0.025 | 0.136 | 0.006 | 0.02  | 0.079 | 0.021 | 0.028 |
| 222           | 0.22  | 0.065 | 0.04  | 0.274 | 0.091 | 0.237 | 0.136 |
| 224           | 0.119 | 0.143 | 0.136 | 0.135 | 0.172 | 0.165 | 0.182 |
| 226           | 0.008 | 0.045 | 0.33  | 0.032 | 0.044 | 0.103 | 0.108 |
| 228           | 0.008 | 0.032 | 0.011 | 0.02  | 0.03  | 0.026 | 0.023 |
| 230           | 0.008 | 0.006 | 0.023 | 0.011 | 0.009 | 0.01  | 0.006 |
| 232           | 0     | 0     | 0     | 0     | 0.002 | 0.01  | 0     |
| 234           | 0     | 0.013 | 0     | 0     | 0.002 | 0     | 0     |
| 236           | 0     | 0     | 0     | 0     | 0.009 | 0     | 0     |

| <b>D6S161</b> | 59    | 77    | 88    | 642   | 219   | 100   | 89    |
|---------------|-------|-------|-------|-------|-------|-------|-------|
| 267           | 0     | 0     | 0     | 0     | 0.002 | 0     | 0     |
| 269           | 0     | 0.039 | 0     | 0     | 0.046 | 0.005 | 0     |
| 271           | 0     | 0     | 0     | 0     | 0.002 | 0     | 0     |
| 273           | 0     | 0     | 0     | 0.002 | 0.002 | 0     | 0     |
| 275           | 0.025 | 0.019 | 0.097 | 0.051 | 0.032 | 0.04  | 0.084 |
| 277           | 0.178 | 0.214 | 0.023 | 0.199 | 0.164 | 0.15  | 0.124 |
| 279           | 0.093 | 0.279 | 0.188 | 0.104 | 0.263 | 0.17  | 0.18  |
| 281           | 0.229 | 0.091 | 0.091 | 0.252 | 0.094 | 0.275 | 0.191 |
| 283           | 0.153 | 0.045 | 0.034 | 0.123 | 0.066 | 0.1   | 0.062 |
| 284           | 0     | 0.013 | 0     | 0     | 0     | 0     | 0     |

|               |           |           |           |              |            |            |           |
|---------------|-----------|-----------|-----------|--------------|------------|------------|-----------|
| 285           | 0.254     | 0.091     | 0.307     | 0.203        | 0.153      | 0.17       | 0.202     |
| 286           | 0         | 0.006     | 0         | 0            | 0          | 0          | 0         |
| 287           | 0.068     | 0.026     | 0.25      | 0.048        | 0.068      | 0.05       | 0.107     |
| 289           | 0         | 0.026     | 0.011     | 0.004        | 0.039      | 0.015      | 0.028     |
| 291           | 0         | 0.084     | 0         | 0.008        | 0.025      | 0.005      | 0.011     |
| 293           | 0         | 0.045     | 0         | 0.002        | 0.039      | 0.015      | 0.011     |
| 295           | 0         | 0.006     | 0         | 0.004        | 0.005      | 0.005      | 0         |
| 297           | 0         | 0.013     | 0         | 0            | 0          | 0          | 0         |
| <hr/>         |           |           |           |              |            |            |           |
| <b>D1S262</b> | <i>58</i> | <i>78</i> | <i>86</i> | <i>624</i>   | <i>210</i> | <i>102</i> | <i>87</i> |
| 337           | 0.009     | 0.006     | 0.012     | 0.007        | 0          | 0          | 0.011     |
| 339           | 0.319     | 0.083     | 0         | 0.286        | 0.138      | 0.343      | 0.259     |
| 341           | 0.026     | 0.16      | 0.134     | 0.024        | 0.1        | 0.049      | 0.063     |
| 343           | 0.483     | 0.096     | 0.57      | 0.479        | 0.193      | 0.328      | 0.46      |
| 345           | 0.043     | 0.244     | 0.023     | 0.073        | 0.236      | 0.103      | 0.069     |
| 347           | 0.121     | 0.327     | 0.238     | 0.128        | 0.281      | 0.152      | 0.132     |
| 349           | 0         | 0.077     | 0.023     | 0.002        | 0.05       | 0.02       | 0         |
| 351           | 0         | 0.006     | 0         | 0.001        | 0.002      | 0          | 0.006     |
| 353           | 0         | 0         | 0         | 0            | 0          | 0.005      | 0         |
| <hr/>         |           |           |           |              |            |            |           |
| <b>D12S35</b> | <i>57</i> | <i>69</i> | <i>87</i> | <i>627</i>   | <i>214</i> | <i>101</i> | <i>88</i> |
| 145           | 0         | 0         | 0         | 0.001        | 0          | 0          | 0         |
| 147           | 0         | 0.029     | 0         | 0            | 0.016      | 0.01       | 0.006     |
| 149           | 0         | 0.007     | 0         | 0            | 0          | 0          | 0         |
| 151           | 0.009     | 0         | 0.023     | 0.049        | 0.009      | 0.035      | 0.04      |
| 153           | 0         | 0         | 0.006     | 0.001        | 0          | 0          | 0.006     |
| 155           | 0         | 0.007     | 0.011     | 0.004        | 0.002      | 0.005      | 0.006     |
| 157           | 0.053     | 0.058     | 0.287     | 0.088        | 0.082      | 0.054      | 0.125     |
| 159           | 0.061     | 0.072     | 0.362     | 0.051        | 0.091      | 0.119      | 0.136     |
| 161           | 0.114     | 0.246     | 0.023     | 0.126        | 0.301      | 0.104      | 0.091     |
| 163           | 0.518     | 0.413     | 0.121     | 0.477        | 0.364      | 0.465      | 0.364     |
| 165           | 0.228     | 0.058     | 0.08      | 0.186        | 0.079      | 0.188      | 0.159     |
| 167           | 0.009     | 0.08      | 0.069     | 0.014        | 0.042      | 0.005      | 0.051     |
| 169           | 0.009     | 0.022     | 0.017     | 0.005        | 0.012      | 0.015      | 0.017     |
| 171           | 0         | 0         | 0         | 0            | 0          | 0          | 0         |
| 173           | 0         | 0         | 0         | 0            | 0          | 0          | 0         |
| 175           | 0         | 0.007     | 0         | 0            | 0          | 0          | 0         |
| <hr/>         |           |           |           |              |            |            |           |
| <b>FY</b>     | <i>56</i> | <i>73</i> | <i>80</i> | <i>568**</i> | <i>209</i> | <i>65</i>  | <i>0</i>  |
| 1             | 0.982     | 0.014     | 0.994     | 0.993        | 0.17       | 0.762      | NA        |
| 2             | 0.018     | 0.986     | 0.006     | 0.007        | 0.83       | 0.238      | NA        |



**Supp. Table S2. Measures of marker informativeness ( $I_n$ )**

| Locus    | $I_n$     |
|----------|-----------|
| FY       | 0.571897  |
| D9S175   | 0.365847  |
| D11S935  | 0.344402  |
| D15S1002 | 0.335369  |
| D7S640   | 0.334067  |
| D17S799  | 0.330229  |
| D7S657   | 0.318761  |
| D5S410   | 0.294771  |
| D10S1786 | 0.278429  |
| D1S2628  | 0.255765  |
| D2S162   | 0.250268  |
| D12S352  | 0.239695  |
| D6S1610  | 0.235412  |
| D13S317  | 0.224106  |
| D16S3017 | 0.222624  |
| D8S272   | 0.221014  |
| D7S2469  | 0.196841  |
| D8S1827  | 0.194982  |
| D19S433  | 0.192089  |
| TH01     | 0.191519  |
| D5S407   | 0.187162  |
| D10S197  | 0.184698  |
| D2S1338  | 0.163459  |
| D5S818   | 0.142387  |
| TPOX     | 0.141501  |
| D22S274  | 0.140814  |
| D14S68   | 0.140542  |
| D7S820   | 0.128379  |
| D21S11   | 0.118183  |
| D1S196   | 0.107297  |
| FGA      | 0.105178  |
| D18S51   | 0.0994379 |
| D3S1358  | 0.0931608 |
| CSF1PO   | 0.09099   |
| D8S1179  | 0.0903916 |
| vWA      | 0.0845733 |
| D16S539  | 0.0698149 |

$I_n$  values were calculated using the Infocalc program written by Dr. Noah Rosenberg. All three ancestral populations were used in the same model to calculate  $I_n$  values. Markers are ordered from most informative (i.e. highest  $I_n$  values) to least informative. As expected FY, which is a marker of African ancestry and is nearly fixed in African ancestral populations has the highest  $I_n$  value in this panel.
